# Supplementary material for: A method for retrieving clouds with satellite infrared radiances using the particle filter
Source: Copernicus journal article supplement (doi:10.5194/gmd-2016-150), 2016-07-04
Supplement: Supplementary file [file gmd-2016-150-AC1-supplement.pdf]

Reply to Reviewer (1)'s comments on gmd-2016-150

[We would like to thank the reviewer for the valuable comments and suggestions. Here are our responses to the reviewer's comments.](#)

Comments to author:

Ensemble forecasts are produced as the routine products in many NWP operational centers. Using these products to estimate uncertainties is convenient and becomes popular.

This paper employed PF method, where the ensemble data is used to estimate cloud fraction, to retrieve cloud. The PF method provided improvements on the accuracies of cloud retrieval, i.e. cloud profile, cloud mask and cloud top, and also made the cost cheaper. This action is meaningful. Glad to see the study when satellite data is increasing in volume and plays the important role in providing extra information in NWP and data assimilation systems.

The extension of PF method to the cloud data retrieval is, I think, a good contribution to the application of cloud products and a good addition to the literature. However, I see some deficiencies or ambiguous sentences in the paper that lead me to suggest major revisions before it is published. I see three major points that need to be corrected or explained.

1) The probabilities of the cloud distribution are presented by the initial particles. Thus, a particle initialization scheme is needed. Authors firstly generated the perturbations of cloud fractions by inflating, deflating and moving the clouds. My question is: (a) why did authors generate perturbations of cloud fractions when the cloud fractions were actually available among the ensemble members? Or say, why not use cloud fraction in ensemble members directly to generate the particles? If authors argue that the ensemble spread of cloud fractions in ensemble dataset is not large enough, it is reasonable but some statements should be stated here. (b) Did authors use any method and rule in this study to inflate, deflate and move the cloud? Some random perturbations might be deficient, and accounting for different

perturbation methods could very well change some of the results in the basic PF experiment. I get the conclusion partly from Fig.4, where the cloud fraction is obviously different between PF and APF and thus the different cloud retrievals are produced.

-----

Reply: Basically, two groups of initial particles are used to retrieve the clouds in PF in this study. The first group includes particles that adding perturbations to clouds in the background in warm starts to further utilize prior information. The second group is to generate one-layer cloud on each model level with an even chance using different numbers of samples (e.g., with 100% interval, 10% interval, and 1% interval). There are two motivations of using the first group particles in addition to the particles in the second group. 1) Although cloud fractions can be actually retrieved with enough particles in group 2 with 1% interval, the computational cost is high, whereas the spread from particles with 10% or 100% intervals is not enough. 2) Since clouds move and evolve continuously in most cases, it may be more efficiently to generate a group of particles based on the warm background.

To make it clear, we added more explanations and statements as “The perturbed cloud fractions are designated to replenish the ensemble by introducing the prior information of the cloud distributions from the background and to increase the ensemble spread.” and “the first one is to generate the perturbed samples  $C_b^i$  (  $\forall i \in [1, n]$  ) from the cloud profile in the background denoted as  $C_b = (c_b^0, c_b^1, \dots, c_b^K)$  by inflating (deflating) the clouds with small magnitudes (  $C_b = \alpha \times C_b, \alpha = 50\%, 55\%, \dots, 150\%$  ) and moving upward (downward) with  $\delta z = +5, +4, \dots, -1, \dots, -5$  as the vertical magnitude, where n is the sample size.” in section 1.

2) L174-175. “Generally, for each FOV, the retrieved cloud fractions are extrapolated to its four neighboring model grid points”. What method is employed by authors to do

the extrapolation from one cloud fraction to its neighboring grid points? Compared with the interpolation from background to FOV, which is a routine way to calculate the residual, is there any chance to make accuracy loss of radiance observations by the extrapolation? If so, how the loss of accuracy affects the weight in Eq. 3? I think authors need to tell the reader in more detail about this.

-----

Reply: Since the final retrieval clouds are on model grids, the retrieved cloud fractions within one FOV are essentially extrapolated to its four neighboring model grid points. Especially, for polar satellite pixels, the representative cloud fractions are extrapolated with an adaptive radius with respect to their scan positions. Since the clouds are retrieved FOV by FOV and the clouds on grids are referred immediately after one FOV is completed, there is no obvious accuracy loss of radiance observations using this conservative method. To make it clear, we added more related explanations and statements in the first paragraph in section 3.3.

3) It is not a real question here. It is fine to use 150 hPa as the highest extent in this study. However, in reality, the tropopause could be higher than 150 hPa, e.g. an anvil cloud in a mature thunderstorm around tropopause at low latitude region. The fact can be also found out in Fig.4, where the cloud fraction around 150 hPa is not zero in the experiment 'PF'. I do not ask authors to run extra experiments to estimate cloud fraction on all model levels because the cloud fraction is too small above 150 hPa and I consider this less important in this study. I just would like to say that we should not omit any extreme weather when we have the ability to resolve it.

-----

Reply: We agree that in reality the tropopause could be higher than 150 hPa occasionally with very small probability. In fig. 4 (using the same y-axis with fig. 2), all the experiments are already conducted using 150 hPa as the highest extent. The reason that the averaged cloud fraction (cf) around 150 hPa is not exactly zero is that the cf is strictly for each model level. The pressure levels on the right y-axis are estimated roughly using the domain averaged pressure. We agree that any extreme weather should not be omitted and thus we added more explanations and statements as

“The MMR and PF cloud detection schemes search the cloud top using approximately 150 hPa as the highest extent for most cloudy cases. Other clouds higher 150 hPa, e.g. an anvil cloud in a mature thunderstorm around tropopause at low latitude region will also be explored in future studies.” in section 3.3 and “Increasing the highest extent cloudy cases will be included in future studies. ” in the future plan.

That is a summary of my major concerns. The following are minor specific concerns generally relevant to specific portions of the text.

Line 13-16: If authors use the qualitative comments (L13-14) as the beginning, I suggest to add, say ‘by using ensemble forecasts/products’, behind PF in L15 to keep consistent to the L13-14. I don’t think that all of readers are familiar with Particle Filter in which the ensemble concept is implicit when they read the abstract firstly, although the PF is introduced in section 2.

-----  
Reply: A new cloud retrieval method is proposed based on the efficient Particle Filter (PF) by using ensembles of cloud information in the framework of Gridpoint Statistical Interpolation system (GSI).

L48-50: Check parenthesis and comma, which do not match.

-----  
Reply: Corrected.

L98-101: Is  $c^0$  constant, if it is not the control variable?

-----  
Reply:  $c^0$  is one of the control variables in the cost function of MMR, instead of a constant. We add more explanations as “ The residual of the modeled radiance and the observation is normalized by the observed radiance, which results in the following cost function, using  $c^k, \forall k \in [0, K]$  as the control variables”

L101-102: Might state how  $R_v^k$  is calculated briefly, e.g by forward CRTM operator

with the inputs of temperature and humidity profiles in background.

-----  
Reply: Accepted. We add statements as “Both  $R_v^k$  and  $R_v^0$  are calculated using a forward radiative transfer model with model profiles of temperature and moisture as inputs.” in the first paragraph of section 2.

L107: Suggest to note that the ‘particles’ correspond with ‘ensemble members’, i.e. one cloud profile as one of particles is derived from an ensemble member.

-----  
Reply: Accepted. We add “Explicitly, the definition of particles corresponds with ensemble members, i.e. one cloud profile as one of particles is corresponding to an ensemble member.” in the fourth paragraph of section 2 to state the definition of particles clearly.

L131: If the observation error in Eq. 3 is specified in GSI, please state it.

-----  
Reply: Here  $p$  is the particle size and  $\sigma$  is the specified observation error, which can be referred in the first paragraph in section 4.1.

L152: Only GOES-13 and -15 used in this study? Does not match with Fig. 4.

-----  
Reply: The sentence is revised as “In this study, GOES-13 (east) and GOES-15 (west) are also utilized to obtain cloud fractions over the continental United States (CONUS) domain.”

L175: See major concern 2.

-----  
Reply: See detailed reply to the above second major points of comments.

L189-196: Do authors implement bias correction for these satellite cloud products as

reference?

-----  
Reply: No. That's why we utilized multiple cloud products for comprehensive comparisons.

L202: Should be Eq. 3.

-----  
Reply: Corrected. Since we added two new equations in ahead of Eq. (3), Eq. (3) is labelled as Eq. (5) in the revised manuscript.

L216: Title of x-axis missed. Also check Fig. 2(c)(d).

-----  
Reply: Done.

L221 and L236: From Fig. 2a, I think the results are produced by using PF, because authors use these words "specified value of cloud fractions". However, the "normalized J0" is showed in Fig. 2c. It is confusing because MMR employs the cost function. If J0 is the residual in Eq. 3, please state it clearly.

-----  
Reply: Yes. Fig. 2ab and Fig. 2cd are all using PF. We add more explanations in the sixth paragraph in section 2 as "A cost function  $J_o$  is defined for each particle to measure how the particle fit the observation as,

$$J_o = \left( \frac{R_v^{\text{obs}} - R_{v,d}^{\text{cloud}}}{\sigma} \right)^2 \quad (4)$$

" to state it clearly.

L249: Fig. 2 could be separated into two figures, cloud fraction Fig. 2(a) (b) and normalized J0 Fig. 2(c)(d).

-----  
Reply: Done.

L293: I guess authors use AIRS as Robs to calculate residual, but need to re-write the word “from AIRS”.

---

Reply: Corrected. We re-write as “with AIRS observations”.

L372: Keep the units consistent. Check Fig. 9 and Fig. 10. Use (hour) or (hr), not (hh).

---

Reply: Corrected.

1 **A method for retrieving clouds with satellite infrared**  
2 **radiances using the particle filter**

3 Dongmei Xu<sup>1,2</sup>, Thomas Auligné<sup>2</sup>, Gaël Descombes<sup>2</sup>, and Chris Synder<sup>2</sup>

4  
5 <sup>1</sup>Key Laboratory of Meteorological Disaster, Ministry of Education (KLME) /Joint  
6 International Research Laboratory of Climate and Environment Change (ILCEC)  
7 /Collaborative Innovation Center on Forecast and Evaluation of Meteorological  
8 Disasters (CIC-FEMD), Nanjing University of Information Science & Technology,  
9 Nanjing 210044, China

10  
11 <sup>2</sup>National Center for Atmospheric Research, Boulder, Colorado 80301, USA

12 (2016/8/13)

Administrator 2016-08-08 10:37 ✓  
带格式的: 法语(法国)

anna 2016-07-30 20:16 ✓  
删除的内容: Collaborative Innovation Center on  
Forecast and Evaluation of Meteorological  
Disasters, Nanjing University of Information  
Science & Technology, Nanjing, 210044, China

anna 2016-08-11 07:21 ✓  
删除的内容: 7

anna 2016-08-11 07:21 ✓  
删除的内容: 30

---

\* **Corresponding Author**

Dr. Dongmei Xu

Nanjing University of Information Science & Technology, College of Atmospheric science,  
Ningliu road, No. 219, Nanjing, 210044, China

E-mail: [xdmjolly@sina.com](mailto:xdmjolly@sina.com)



## 15 **Abstract**

16 Ensemble-based techniques have been widely utilized in estimating uncertainties in  
17 various problems of interest in geophysical applications. A new cloud retrieval  
18 method is proposed based on the efficient Particle Filter (PF) by using ensembles of  
19 cloud information in the framework of Gridpoint Statistical Interpolation system  
20 (GSI). The PF cloud retrieval method is compared with the Multivariate and  
21 Minimum Residual (MMR) method that was previously established and verified.  
22 Cloud retrieval experiments involving a variety of cloudy types are conducted with  
23 the PF and MMR methods respectively with measurements of Infrared radiances on  
24 multi-sensors onboard both geostationary and polar satellites. It is found that the  
25 retrieved cloud masks with both methods are consistent with other independent cloud  
26 products. MMR is prone to producing ambiguous small-fraction clouds, while PF  
27 detects clearer cloud signals, yielding closer heights of cloud top and cloud base to  
28 other references. More collections of small fraction particles are able to effectively  
29 estimate the semi-transparent high clouds. It is found that radiances with high spectral  
30 resolutions contribute to quantitative cloud top and cloud base retrievals. In addition,  
31 a different way of resolving the filtering problem over each model grid is tested to  
32 better aggregate the weights with all available sensors considered, which is proven to  
33 be less constrained by the ordering of sensors. Compared to the MMR method, the PF  
34 method is overall more computationally efficient, and the cost of the model grid-based  
35 PF method scales more directly with the number of computing nodes.

36 **Keywords:** cloud retrieval methods, particle filter, GSI system, cloud height

## 37 1. Introduction

38 Modern polar orbiting and geostationary airborne instruments provide researchers  
39 unprecedented opportunities for earth remote sensing with continuous flows and  
40 almost complete spectral coverage of data. The primary cloud retrieval products from  
41 satellites are cloud mask (CM), cloud height (CH), effective cloud fraction (CF), and  
42 vertical structures of clouds with larger temporal and spatial scales. These cloud  
43 retrievals provide an immense and valuable combination for better initializing  
44 hydrometeors in numerical weather prediction (NWP), (Wu and Smith, 1992; Hu et  
45 al., 2006; Bayler et al., 2000; Auligné et al., 2011) regulating the radiation budget for  
46 the planet, and understanding the climate feedback mechanism (Rossow and Schiffer,  
47 1991; Rossow et al., 1993; Brückner et al., 2014). Advanced cloud retrieval methods  
48 are able to retrieve clouds with multispectral techniques (Menzel et al., 1983; Platnick  
49 et al., 2003), among which the minimization methods usually directly utilize the  
50 difference between the modeled clear sky and the observed cloudy Infrared (IR)  
51 radiances (e. g., the minimum residual method, (Eyre and Menzel, 1989); the  
52 Minimum Local Emissivity Variance method, (Huang et al., 2004); and the  
53 Multivariate Minimum Residual method, (Auligné, 2014a)). Specially, the  
54 Multivariate Minimum Residual (MMR) method is retrieving three dimensional  
55 multi-layer clouds by minimizing a cost function at each field-of-view (FOV)  
56 (Auligné, 2014b; Xu et al., 2015). MMR has been proven to be reliable in retrieving  
57 the quantitative three dimensional cloud fractions with Infrared radiances from

58 multiple infrared instruments. However, MMR has limitations in several aspects due  
59 to its use of minimization for solution: 1) Part of the control variables accounting for  
60 the cloud fraction for some certain levels are under-observed since the channels are  
61 not sensitive to the existence of clouds for those heights. 2) When clouds at different  
62 heights show opacities with the same spectral signal, MMR could lose the ability to  
63 distinguish solutions involving clouds at those levels. 3) The computational cost for  
64 the minimization procedure in MMR is rather considerable.

65 Ensemble-based techniques, that usually reside in short-term ensemble  
66 forecasting (Berrocal et al., 2007), assembling existing model outputs (e. g., cloud  
67 retrievals) from varying algorithms (Zhao et al., 2012), or ensemble Kalman filter  
68 (EnKF) in various forms (Snyder and Zhang, 2003), have been widely developed in  
69 order to estimate the uncertainties of all kinds of problems in geophysical applications.  
70 To better account for the non-linearity between the observed radiance and the retrieval  
71 parameter, a novel prototype for detecting clouds and retrieving their vertical  
72 extension inspired by the particle filter (Snyder and Zhang, 2003; van Leeuwen, 2010;  
73 Shen and Tang, 2015) technique and Bayesian theory (Karlsson et al., 2015) is  
74 proposed in this study. As a competitive alternative for MMR, the PF retrieval method  
75 has same critical inputs required and cloud retrieval products as in MMR. A brief  
76 description of MMR and the new PF cloud retrieval algorithm are provided in the  
77 following section. Section 3 describes the background model, the data assimilation  
78 system, the radiative transfer models (RTMs), and the radiance observations applied  
79 in this study. Model configurations are also illustrated in section 3. In section 4, the

80 single test within one FOV is conducted before the performance of PF method is  
81 assessed by comparing its cloud retrievals with those from MMR and other  
82 operational cloud products. Section 4 also discusses the computational performance  
83 for the two methods. The conclusion and anticipated future work are outlined in  
84 section 5.

## 85 2. Methodology

86 Essentially, the PF cloud retrieval scheme retrieves clouds with the same critical  
87 inputs requested (i. e., clear sky radiance from the radiative transfer model and the  
88 observed radiance) and the same cloud retrievals as outputs (i. e., three dimensional  
89 cloud fractions, which is defined as the fraction of top of cloud as seen from a sensor)  
90 with the MMR method. Both cloud retrieval schemes consist of finding cloud  
91 fractions that allow best fit between the cloudy radiance from model and the  
92 observation. We use  $c^1, c^2, \dots, c^K$  to denote the array of vertical effective cloud  
93 fractions for K model levels ( $c^1$  for the surface and  $c^K$  for the model top) and  $c^0$  as  
94 the fraction of clear sky with  $0 \leq c^k \leq 1, \forall k \in [0, K]$ . The constraint for the cloud  
95 fraction is as follows,

96 
$$\sum_{k=0}^K c^k = 1 \quad (1)$$

97 In this study, a cloud on one model level with a given fraction  $c^k$  is assumed to  
98 block the radiation from its lower model levels. The radiation originating from its

anna 2016-08-06 19:26 ✓  
删除的内容: effective

Administrator 2016-08-11 10:24 ✓  
带格式的: 字体颜色: 自动设置

Administrator 2016-08-08 08:35 ✓  
删除的内容: Details of the schematic of the MMR method can be referred in (Xu et al., 2015; Descombes et al., 2014).

anna 2016-08-06 20:22 ✓  
删除的内容: ,

Administrator 2016-08-11 10:24 ✓  
带格式的: 字体颜色: 自动设置

99 lower levels is assumed to contribute to the top of atmosphere radiance observed by  
100 the satellites only with the residual fractions.

101 The MMR method is an approach to retrieve cloud fractions using the  
102 minimization technique. The residual of the modeled radiance and the observation is  
103 normalized by the observed radiance, which results in the following cost function,  
104 using  $c^k, \forall k \in [0, K]$  as the control variables,

$$105 \quad J(c^0, c^1, c^2, \dots, c^K) = \frac{1}{2} \sum_v \left[ \frac{R_v^{\text{cloud}} - R_v^{\text{obs}}}{R_v^{\text{obs}}} \right]^2, \quad (2)$$

106 where  $R_v^{\text{cloud}}$  is the modeled cloudy radiance, and  $R_v^{\text{obs}}$  the observed radiance at  
107 frequency  $v$ . This vertical cloud fraction  $c^1, c^2, \dots, c^K$  and  $c^0$  are control variables for  
108 the cost function, where the simulated  $R_v^{\text{cloud}}$  is defined as

$$109 \quad R_v^{\text{cloud}}(c^0, c^1, c^2, \dots, c^K) = c^0 R_v^0 + \sum_{k=1}^K c^k R_v^k. \quad (3)$$

110 Here  $R_v^k$  is the radiance calculated assuming an overcast black cloud at the model  
111 level  $k$  and  $R_v^0$  the radiance calculated in the clear sky. Both  $R_v^k$  and  $R_v^0$  are  
112 calculated using a forward radiative transfer model with model profiles of temperature  
113 and moisture as inputs. Details of the schematic of the MMR method can be referred  
114 in (Xu et al., 2015; Descombes et al., 2014).

115 Particle filter (PF) approach is one of the nonlinear filters for data assimilation  
116 procedures to best estimate the initial state of a system or its parameters  $x_t$ , which  
117 describes the time evolution of the full probability density function  $p(x_t)$  conditioned  
118 by the dynamics and the observations. Similar to (Mechri et al., 2014), the  
119 bibliography on PF focuses on estimating the parameters, which are cloud fractions

Administrator 2016-08-10 22:03 ✓

删除的内容:  $0 \leq c^k \leq 1, \forall k \in [0, K]$ .

anna 2016-08-06 19:54 ✓

删除的内容: 1

anna 2016-08-06 19:54 ✓

删除的内容: 2

anna 2016-08-06 20:00 ✓

删除的内容: with  $c^0 + \sum_{k=1}^K c^k = 1$  as the constraint.

120  $c^k$  in Eq. (3), in this study. While MMR retrieves the cloud fractions on each model  
121 vertical level by minimizing a cost function, PF calculates posterior weights for each  
122 ensemble member based on the observation likelihood given that member. In its  
123 simplest form, PF works by initializing a collection of cloud profiles as particles and  
124 then estimating the cloud distributions by averaging those particles with their  
125 corresponding weights. Explicitly, each particle's weight is computed with the  
126 difference between the modeled cloudy radiance from the particle and the observed  
127 radiance.

128 As the probabilities of the cloud distribution are fully presented by the initial  
129 particles, of particular interest is to evaluate different particle initialization schemes in  
130 the PF method. Explicitly, the definition of particles corresponds with ensemble  
131 members, i.e. one cloud profile as one of particles is corresponding to an ensemble  
132 member.

133 Two approaches for generating particles are firstly designed; the first one is to  
134 generate the perturbed samples  $C_b^i$  ( $\forall i \in [1, n]$ ) from the cloud profile in the  
135 background denoted as  $C_b = (c_b^0, c_b^1, \dots, c_b^K)$  by inflating (deflating) the clouds with  
136 small magnitudes ( $C_b = \alpha \times C_b, \alpha = 50\%, 55\%, \dots, 150\%$ ) and moving upward  
137 (downward) with  $\delta z = +5, +4, \dots, -1, \dots, -5$  as the vertical magnitude, where  $n$  is the  
138 sample size. The perturbed cloud fractions are designated to replenish the ensemble  
139 by introducing the prior information of the cloud distributions from the background  
140 and to increase the ensemble spread.

|                                                 |   |    |
|-------------------------------------------------|---|----|
| anna 2016-08-06 09:43                           | ✓ | 🗑️ |
| 删除的内容: typical                                  |   |    |
| anna 2016-07-30 20:22                           | ✓ | 🗑️ |
| 删除的内容: $P_b(\mathbf{c} = c^0, c^1, \dots, c^K)$ |   |    |
| Administrator 2016-08-08 12:54                  | ✓ | 🗑️ |
| 删除的内容: ,                                        |   |    |
| Administrator 2016-08-08 12:54                  | ✓ | 🗑️ |
| 删除的内容: , and moving                             |   |    |

141 Besides those perturbed particles, to represent the existence of one-layer cloud  
 142 on each model level with an even chance, another diversity set of profiles  $C_b^i$   
 143 ( $\forall i \in [0, K]$ ) are also initialized, among which,  $C_b^i$  stands for the profile with 100%  
 144 cloud fraction on the model level  $i$  ( $c^i=100\%$ ) and 0% cloud on the rest levels. In  
 145 particular,  $C_b^0$  defines 100% clear ( $c^0=1$ ). It is also interesting to discretize the initial  
 146 particles by setting the one-layer cloud with the value of  $c^i$  from 100% to 0% (e. g.,  
 147 100%, 90%, 80%, ..., 0% with 10% as the interval) and further from 100% to 0% (e.  
 148 g., 100%, 99%, 98%, 97%, ..., 0% with 1% as the interval). In this cases,  $c^0=1-c^i$ . For  
 149 each particle  $C_b^i$ , its simulated cloudy radiance  $R_{v,i}^{\text{cloud}}$  from the model background can  
 150 be obtained with Eq. (2).

151 A cost function  $J_0$  is defined for each particle to measure how the particle fit the  
 152 observation as,

$$153 \quad J_0 = \left( \frac{R_v^{\text{obs}} - R_{v,i}^{\text{cloud}}}{\sigma} \right)^2. \quad (4)$$

154 The weight  $w^i$  for each particle  $C_b^i$  thus is calculated by comparing the simulated  
 155  $R_{v,i}^{\text{cloud}}$  and the observation  $R_v^{\text{obs}}$  using the exponential function by accumulating the  
 156  $J_0$  for multiple frequency as

$$157 \quad w^i = e^{-\sum_v \left( \frac{R_v^{\text{obs}} - R_{v,i}^{\text{cloud}}}{\sigma} \right)^2}, \quad (5)$$

158  $\forall i \in [1, p]$ . Here  $p$  is the particle size and  $\sigma$  is the specified observation error, which  
 159 can be referred in the first paragraph in section 4.1. The final analyzed  $C_a$  is obtained  
 160 by averaging the background particles  $C_b^i$  with their corresponding weight, as

anna 2016-07-30 20:25 ✓

删除的内容: P<sub>b</sub>

anna 2016-07-30 20:26 ✓

删除的内容: P<sup>i</sup>

anna 2016-07-30 20:26 ✓

删除的内容: P<sup>0</sup>

anna 2016-07-30 20:26 ✓

删除的内容: P<sub>b</sub>

anna 2016-08-06 19:17 ✓

带格式的: 缩进: 首行缩进: 0 字符

anna 2016-07-30 20:26 ✓

删除的内容: P<sub>b</sub>

anna 2016-08-06 19:15 ✓

带格式的: 字体: 倾斜

anna 2016-08-06 19:14 ✓

带格式的: 下标

anna 2016-08-06 19:55 ✓

删除的内容: 3

anna 2016-08-06 19:15 ✓

删除的内容:

Administrator 2016-08-10 22:10 ✓

删除的内容: P

anna 2016-07-30 20:28 ✓

删除的内容: P<sub>b</sub>

161

$$C_a = \sum_{i=1}^p w^i C_b^i. \quad (6)$$

162 In Eq. (6), the constraint referred in Eq. (1) is not respected. Thus, after the analysis

163 step for the particle filter, the final averaged cloud fractions  $C_a^k$  are normalized by

164

$$c_a^k = \frac{c^k}{\sum_{k=0}^K c^k}, \quad (7)$$

165 where  $\forall k \in [0, K]$ .

### 166 3. Data and model configurations

#### 167 3.1 Data

168 The Advanced Infrared Sounder (AIRS), the Infrared Atmospheric Sounding  
 169 Interferometer (IASI), and the Cross-track Infrared Sounder (CrIs) are among the  
 170 most advanced hyperspectral infrared sounders and thus are applied for retrieving  
 171 clouds with hundreds of channels (Blumstein et al., 2004) (Aumann et al., 2003; Xu  
 172 et al., 2013; Smith et al., 2015). The Radiance measurements from Moderate  
 173 Resolution Imaging Spectroradiometer (MODIS) onboard the Earth Observing  
 174 System (EOS) Terra or Aqua satellites are also well suited to extracting valuable  
 175 cloud information from the 36 spectral broadbands in the visible, near infrared and  
 176 infrared regions at high spatial resolution (1–5 km) (Ackerman, 1998). Apart from  
 177 the IR radiances from polar satellites, the Geostationary Operational Environmental  
 178 Satellites (GOES) Imager (Menzel and Purdom, 1994) provides a continuous stream

|                                   |   |    |
|-----------------------------------|---|----|
| anna 2016-08-06 19:55             | ✓ | 🗑️ |
| 删除的内容: 4                          |   |    |
| Administrator 2016-08-07 18:23    | ✓ | 🗑️ |
| 删除的内容: A                          |   |    |
| anna 2016-08-06 10:23             | ✓ | 🗑️ |
| 删除的内容: updating all the particles |   |    |
| anna 2016-08-06 11:17             | ✓ | 🗑️ |
| 带格式的: 右                           |   |    |
| anna 2016-08-06 11:17             | ✓ | 🗑️ |
| 删除的内容:                            |   |    |
| anna 2016-08-06 11:17             | ✓ | 🗑️ |
| 删除的内容:                            |   |    |
| anna 2016-08-06 19:55             | ✓ | 🗑️ |
| 删除的内容: 5                          |   |    |

|                                |   |    |
|--------------------------------|---|----|
| Administrator 2016-08-10 23:06 | ✓ | 🗑️ |
| 删除的内容: (                       |   |    |
| Administrator 2016-08-10 23:06 | ✓ | 🗑️ |
| 删除的内容: )                       |   |    |
| Administrator 2016-08-10 23:06 | ✓ | 🗑️ |
| 删除的内容: (                       |   |    |



179 of data over the observing domain. In this study, GOES-13 (east) and GOES-15  
180 (west) are also utilized to obtain cloud fractions over the continental United States  
181 (CONUS) domain. The GOES Imager used in this study is a five-channel (one  
182 visible, four infrared) imaging radiometer designed to sense radiant and solar  
183 reflected energy. The instrument parameters for the sensors and the setups for  
184 channel selections can be found in (Xu et al., 2015).

### 185 3.2 WRF, GSI and the radiative transfer model

186 The background fields are processed running the Weather Research and Forecast  
187 (WRF) model (Skamarock et al., 2008). The MMR and PF cloud retrieval algorithms  
188 are both implemented based on the gridpoint statistical interpolation data assimilation  
189 system (GSI) (Wu et al., 2002; Kleist et al., 2009), which is a widely used data  
190 assimilation system in operations and researches in NWP. GSI is capable of ingesting  
191 a large variety of satellite radiance observations and has developed capabilities for  
192 data thinning, quality control, and satellite radiance bias correction. The Community  
193 Radiative Transfer Model (Liu and Weng, 2006; Han et al., 2006) was used as the  
194 radiance forward operator for computing the clear-sky radiance and the radiance given  
195 overcast clouds at each model level.

### 196 3.3 Model configurations

197 The WRF is configured with 415\*325 horizontal grids at 15-km grid spacing, and  
198 40 vertical levels up to 50 hPa within the single CONUS domain. The MMR and PF

Administrator 2016-08-10 22:59 ✓ ⌵  
删除的内容: (  
Administrator 2016-08-10 23:00 ✓ ⌵  
删除的内容: (!!! INVALID CITATION !!!)

Administrator 2016-08-10 23:00 ✓ ⌵  
删除的内容: (  
Administrator 2016-08-10 23:00 ✓ ⌵  
删除的内容: (!!! INVALID CITATION !!!)

199 cloud detection schemes search the cloud top using approximately 150 hPa as the  
200 highest extent for most cloudy cases. Other clouds higher 150 hPa, e.g. an anvil cloud  
201 in a mature thunderstorm around tropopause at low latitude region will also be  
202 explored in future studies. Channels in the longwave region are utilized following the  
203 channel selection scheme in (Xu et al., 2015). Since the final retrieval clouds are on  
204 model grids, the retrieved cloud fractions within one FOV are essentially extrapolated  
205 to its four neighboring model grid points. Generally, for each FOV, the retrieved  
206 cloud fractions are extrapolated to its four neighboring model grid points. For polar  
207 satellite pixels, the representative cloud fractions are extrapolated with an adaptive  
208 radius with respect to their scan positions. The cloud detecting procedure for  
209 retrieving clouds is conducted for each FOV from each individual sensor  
210 independently and sequentially. Since the clouds are retrieved FOV by FOV and the  
211 clouds on grids are referred immediately after one FOV is completed, there is no  
212 obvious accuracy loss of radiance observations using this conservative method.

Administrator 2016-08-11 10:28 ✓

带格式的: 字体颜色: 自动设置

## 213 4. Experiments and results

214 The PF experiments apply two groups of particles as mentioned in section 2,  
215 among which the group-2 particles contains solely 100% one-layer clouds. To reveal  
216 how the setup of the initial particles impacts the results, apart from the MMR and PF  
217 experiments, we included another advanced experiment, denoted as APF. APF  
218 requires more sampled particles including ranges of cloud fractions spanning from 0%  
219 to 100% at the interval of 10%. An additional experiment “APFg2”, similar to APF

220 but excluding the perturbed particles from the background in group-1 introduced in  
221 section 2, was conducted to evaluate the added values from the group-one particles. In  
222 this section, cloud retrieval experiments for several cases containing clouds of a  
223 variety of types are conducted for comparison reason. The GOES imager retrieved  
224 products from National Aeronautics and Space Administration (NASA-Langley cloud  
225 and radiation products) are applied as a reference to validate the cloud retrieving  
226 methods for the CONUS domain with a large and uniform coverage of cloud mask. In  
227 addition, the retrieved cloud products were also compared to available CloudSat  
228 (Stephens et al., 2002) and MODIS level-2 cloud products (Platnick et al., 2003)  
229 archived by the CloudSat Data Processing Center in Colorado State and NASA  
230 respectively.

#### 231 4.1 Single test at one field of view

232 The PF cloud retrieving algorithm retrieves the cloud distributions by averaging  
233 those initial particles with their weights. Before the real case experiments are carried  
234 out over the whole domain, we conduct a single cloud retrieving test at one FOV to  
235 understand what differences can be explained by the differences in the basic initial  
236 particles. In Eq. (5), the observation error  $\sigma$  can be set proportional to the

237 observation, equaling to  $\frac{R_v^{\text{obs}}}{r}$ , where  $r$  is the prescribed ratio. Thus, the cloud

238 signals on each level  $k$  are virtually determined by the extent of how close the  $\frac{R_v^k}{R_v^{\text{obs}}}$

239 (and  $\frac{R_v^0}{R_v^{\text{obs}}}$  for the clear part) gets to 1. An example of the ratio of the overcast

anna 2016-08-06 19:55 ✓

删除的内容: 7

240 radiance and the observed radiance  $\frac{R_v^k}{R_v^{obs}}$  for each model level is given in Fig. 1 of  
 241 GOES-Imager for the channel 5 ( $\sim 13.00 \mu m$ ). The clear sky radiance normalized by  
 242 the observed radiance  $\frac{R_v^0}{R_v^{obs}}$  is also shown at the level 0 (Fig. 1). It is expected that  
 243 the overcast radiance from the RTM decrease with the rising of the altitude. The cloud  
 244 signal is strongest around level 5, where  $R_v^k$  fits  $R_v^{obs}$  most closely. The cloud  
 245 retrievals depend not only on the basic input profiles (i.e., the overcast radiance on  
 246 each level from RTM normalized by the observed radiance and the clear sky radiance  
 247 from RTM normalized by the observed radiance) and but also on the algorithm  
 248 applied for resolving the problem (e.g., MMR and PF in this study).

249

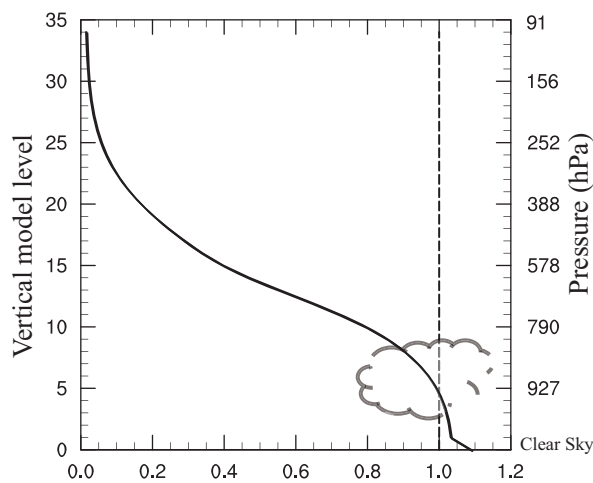

250

251 **Figure 1.** Ratio of the overcast radiances versus the observed radiance starting from the level 1.  
 252 The ratio of the clear sky radiance normalized by the observed radiance corresponds to the level 0  
 253 (see text for explanation) for GOES-Imager for the channel 5. The approximate pressures  
 254 corresponding to the model levels are also denoted.

255 To reveal the roles of various initial particles, Fig. 2a shows the weights for  
 256 different particles of one-layer cloud in group 2 described in section 2 with specified  
 257 value of cloud fractions  $c^k$  (on the x-axis) on specified model levels  $k$  (on the y-axis)  
 258 from 10% to 100% every 10% on the given FOV for channel 5 of GOES-Imager for  
 259 the case shown in Fig. 1. With a fraction  $c^k$  of one-cloud layer at a given level  $k$  and  
 260 a fraction of  $c^0 = 1 - c^k$  of clear sky, the simulated cloudy radiance can be denoted as  
 261  $R_v^{\text{cloud}} = c^k R_v^k + (1 - c^k) R_v^0$ . Hence the theoretical one-layer cloud fraction is solved as  
 262  $c^k = \frac{R_v^0 - R_v^{\text{obs}}}{R_v^0 - R_v^k}$  by fitting  $R_v^{\text{cloud}}$  to  $R_v^0$ . As expected, for one-layer cloud with full  
 263 fraction,  $c^5$  fits most closely to 100%. Since with the concept that  $R_v^k > R_v^{k+1}$ , no  
 264 cloud can be present below level 5 since this would implies a  $R_v^{\text{cloud}}$  larger than the  
 265 observation (or a  $c^i$  larger than 100%). It seems that clouds can be described by  
 266 different possible states as particles with both large fractions and small fractions. Low  
 267 clouds are easily estimated by one-layer cloud profile with large fractions (larger than  
 268 10%). The particles with small-fraction high clouds gain some weights to retrieve  
 269 high clouds. The particle with the one-layer cloud on level 13 seems to gain least  
 270 weight compared to the others levels. The weights for the particles with cloud  
 271 fractions from 0% to 100% at the interval of 1% are also presented in Fig. 2b. By  
 272 including more small-fraction one-layer clouds, the clouds around level 13 can be  
 273 reproduced by the group of refined particles with 1% as the interval for approximate  
 274 10% cloud fractions. However, changing the level of the cloud for the fixed fraction  
 275 (10%) does not seem to change the outgoing radiance much, probably due to the  
 276 channel's low weight function peak (~750hPa).

Administrator 2016-08-08 11:06 ✓  
 带格式的: 字体: 倾斜

Administrator 2016-08-11 10:35 ✓  
 带格式的: 字体颜色: 自动设置

Administrator 2016-08-11 10:35 ✓  
 带格式的: 字体颜色: 自动设置

Administrator 2016-08-08 11:13 ✓  
 删除的内容: by

277 The normalized  $J_o$  in Eq. (6) for different levels with a specific cloud fraction  
 278 from 0% to 100% every 10% are shown in the bottom panel of Fig. 2, with 10% and  
 279 1% as the intervals in Fig. 2c and Fig. 2d respectively. Here,  $J_o$  can be further derived  
 280 as

$$281 \quad J_o = r^2 \left( 1 - c^0 \frac{R_v^0}{R_v^{obs}} - c^k \frac{R_v^k}{R_v^{obs}} \right)^2 \quad (8).$$

282 with  $\sigma = \frac{R_v^{obs}}{r}$  and  $R_v^{cloud}(c^0, c^1, c^2, \dots, c^K) = c^0 R_v^0 + \sum_{k=1}^K c^k R_v^k$ .

283 From Fig. 2c, it is found that  $J_o$  is smallest around level-5 with 100% cloud  
 284 fraction (denoted as 1 in legend) for the thin black line, with respect to the fact that  
 285 the overcast radiance fits the observed radiance most closely for level-5  
 286 approximately. The gray line with 10% cloud fraction (0.1 in the legend) corresponds  
 287 to the existence of a weight peak on level 19 in Fig. 2a. In addition, the gap between  
 288 the gray line with 0.1 and the other lines from 0.2 to 1 explains why there's less  
 289 continuity around level 13. Fig. 2d shows a similar pattern to Fig. 2c, except with  
 290 densely-distributed  $J_o$  values around the level 13 from 0.1 to 1 in the legend. Those  
 291 contiguous black lines in Fig. 2d are associated with the set of particles with cloud  
 292 fractions from 10% to 100% at the interval of 1%.

293

294

Administrator 2016-08-11 13:50 ✓  
 删除的内容:

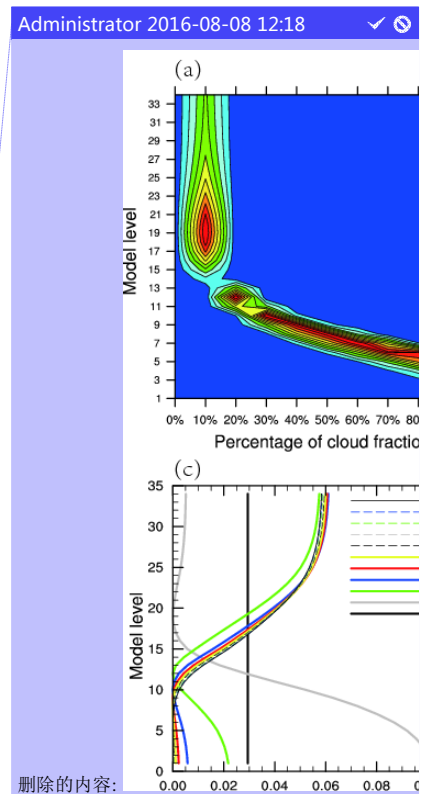

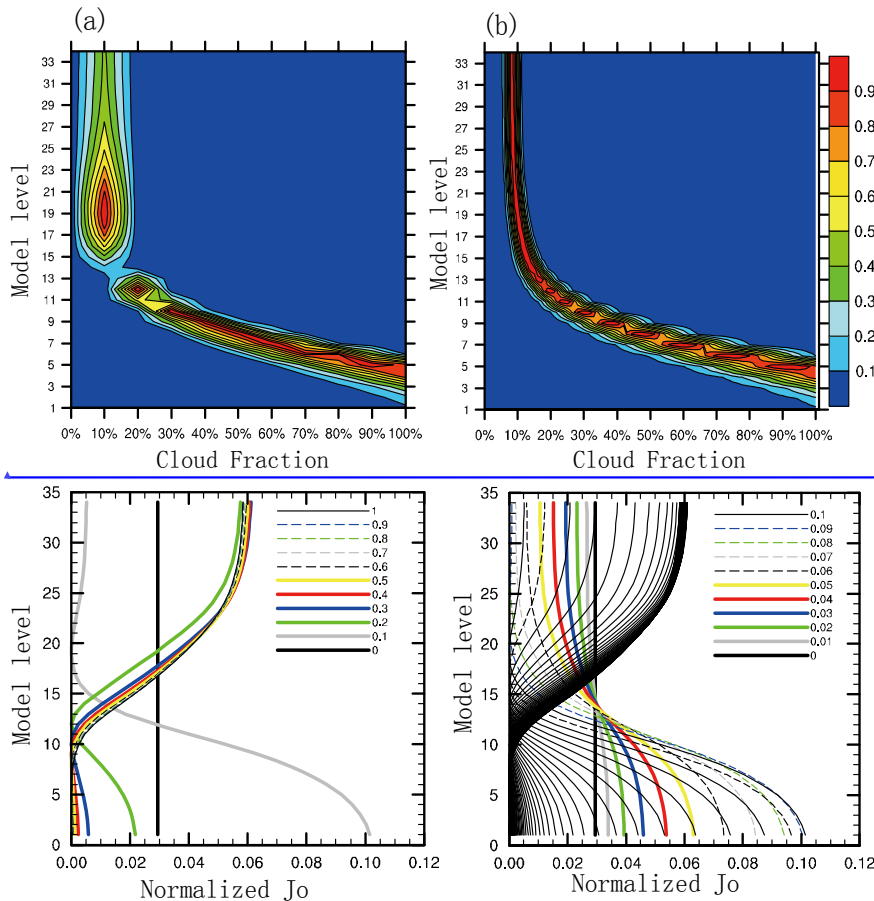

Administrator 2016-08-08 12:18 ✓

带格式的: 字体: 加粗

Administrator 2016-08-08 12:19 ✓

带格式的: 字体: 加粗

295

296

297 **Figure 2.** The weights for different particles with specified cloud fractions on the x-axis at one  
 298 chosen model level shown on the y-axis from 0% to 100% (a) at the interval of 10% and (b) at the  
 299 interval of 1%. The normalized  $J_o$  (c) at the interval of 10% and (d) at the interval of 1%. In (d),  
 300 the normalized  $J_o$  from 0.1 to 1 are all denoted as black lines.

301 4.2 Cloud profiles

302 The retrieval experiments for a real case are conducted at 1100 UTC 3 June 2012  
 303 when AIRS measurements and the CloudSat “2B-GEOPROF” products (Mace, 2004)

304 are available. The vertical cross sections of the cloud fraction field of a real case are  
305 illustrated to further check how different collections of initial particles impact the  
306 retrieved cloud profiles. The standard radar reflectivity profiles from the CloudSat are  
307 shown in Fig. 3a as the validation source; Fig. 3b, Fig. 3c, and Fig. 3d show the cross  
308 sections of the cloud fractions along the CloudSat orbit tracks from the MMR, PF and  
309 APF experiments. The vertical structures of the clouds from MMR compare well with  
310 the radar reflectivity from CloudSat by retrieving the high clouds around 47N° and  
311 low clouds around 52N°. The PF experiment has difficulties in detecting the cloud  
312 tops appropriately. PF tends to detect a large quantity of low clouds; by adding a set of  
313 particles with small-fraction clouds in APF, higher clouds can be reproduced, which is  
314 consistent with the implications from Fig. 2b and 2d. APF detects clear strong cloud  
315 signals and removes the cloud fractions on near-surface levels around 36 N°  
316 successfully. Since the existences of ground-layer radar reflectivity are likely  
317 corresponding to the strong reflection from the underlying surface of the earth, the  
318 height of cloud bases of MMR and PF are not compared in this sub-section. The  
319 experiments with larger size of particles including 0% to 20% (at the interval of 1%)  
320 plus 30% to 100% (at the interval of 10%) or of 0% to 100% (at the interval of 1%)  
321 one-layer cloud profiles (introduced in section 2) yield similar results from APF but  
322 are much more costly (not shown).

323



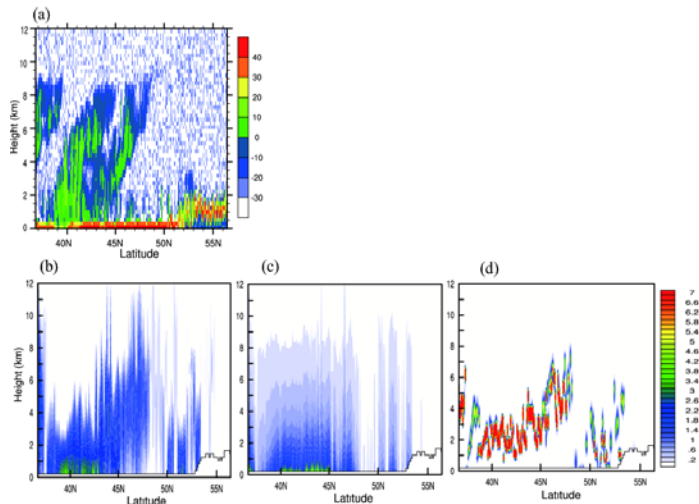

324

325 **Figure 3.** (a) The radar reflectivity (units: DBZ) cross sections from CloudSat, (b) the MMR  
 326 retrieved cloud fractions (units: %) cross sections, (c) the PF retrieved cloud fractions, and (d) the  
 327 APF retrieved cloud fractions valid at 1100 UTC 3 June 2012.

328 The vertical profiles of the averaged cloud fractions from MMR, PF, and APF are  
 329 plotted in Fig. 4 at 1100 UTC 3 June 2012 with AIRS. Both MMR and PF  
 330 experiments yield ambiguous cloud distributions, whereas APF retrieves much  
 331 stronger cloud signals constrained between level-2 to level-20 (approximately from  
 332 950hPa to 400hPa). More clouds around level 10 are retrieved (approximately 750hPa)  
 333 in MMR, while PF is prone to retrieving clouds near surface levels. Note that MMR  
 334 retrieves much higher cloud tops and lower cloud bases compared to APF. The cloud  
 335 base from PF is lowest; the cloud top from MMR and PF is comparable. Only the  
 336 APF related methods will be further discussed in later sections owing to the missing  
 337 of high clouds using PF.

338

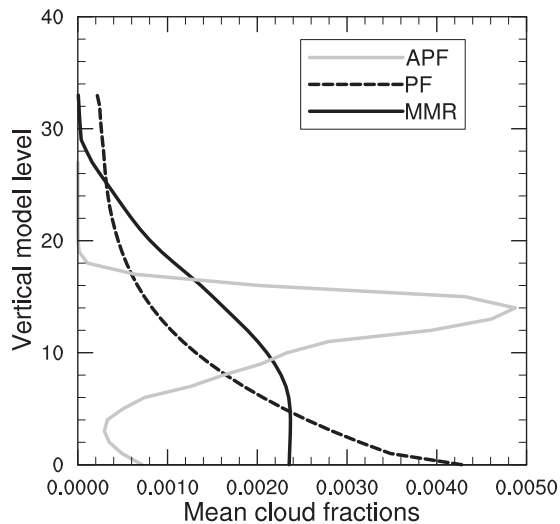

339  
 340 **Figure 4.** The mean cloud fraction on all model levels for the experiments MMR, PF, and APF  
 341 with AIRS observations valid at 1100 UTC 3 June 2012.

342 4.3 Cloud mask

343 Comparison experiments on real cases are further performed for over longer time  
 344 period from 0000 UTC 12 December 2013 to 0700 UTC 12 December 2013. The  
 345 cloud mask is marked as cloudy when there is a recognizable existence of cloud on  
 346 any level from MMR or PF retrievals. Both the NASA GOES Imager products and the  
 347 MMR-retrieved fields are interpolated to the same  $0.1^\circ \times 0.1^\circ$  latitude–longitude grid  
 348 with 0 for clear and 1 for cloudy before the comparisons for verification. Fig. 5 shows  
 349 the *hits*, *false\_alarms* and *misses* locations with the use of GOES-Imager, MODIS,  
 350 CrIS, AIRS, and IASI radiances in the retrieval algorithms at 0700 UTC 12 December  
 351 2013. Note that, cloud mask retrievals from both the MMR and APF hit the clear and  
 352 cloudy events well in Fig. 5a and 5b. In most areas, the MMR experiment

anna 2016-08-06 08:35 ✓  
 删除的内容: from

anna 2016-08-06 08:39 ✓  
 删除的内容: radiances from

353 overestimated the cloud mask with more false alarm events compared to the APF  
 354 experiment, since the MMR solution is an “overly smoothed” estimation of the true  
 355 vertical profile. It seems that the accuracy of cloud detection is lower for areas with  
 356 high altitude than under tropical conditions, indicating that the smaller lapse rate in  
 357 the atmosphere will lead radiance less sensitivity to clouds over polar areas. Fig. 5c  
 358 shows the cloud mask results from the APFg2 experiment without the perturbed  
 359 particles in group-1 introduced in section 2. There is no large discrepancy between  
 360 Fig. 5b and Fig. 5c, suggesting that the particles in group-2 that fully span the  
 361 possibility of the cloud distributions, are more determinant in retrieving the cloud  
 362 mask.  
 363

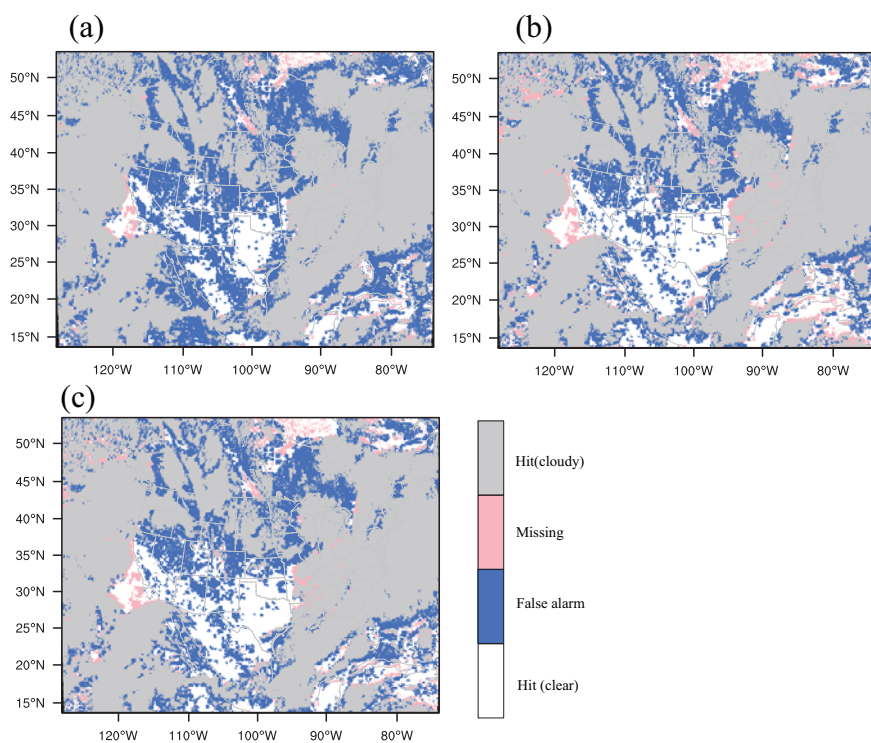

364

365 **Figure 5.** The false alarms, misses, and hits for clear and cloudy event locations with (a) the MMR  
366 method, (b) the APF method, and (c) the APF method but without the group-1 particles (see text  
367 for detailed explanations) valid at 0700 UTC 15 December 2013.

#### 368 4.4 Cloud top and base pressure

369 The retrieved cloud top pressures (CTP) and cloud bottom pressures (CBP) from  
370 this study along with the NASA GOES cloud products are illustrated in Fig. 6. The  
371 CTPs from both methods are in good accordance with the NASA cloud products for  
372 high clouds (from 100 hPa to 600 hPa) in Fig. 6a, 6c, and 6e. The retrieved cloud top  
373 heights from MMR are overall higher than those from the NASA reference, especially  
374 for lower clouds at approximately 750-1000 hPa (e. g., between longitude  $-100^{\circ}$  and  
375  $-90^{\circ}$ ). On the other hand, the CTPs from APF are much closer to those in the  
376 reference for both high and low clouds. APF overestimates the CBPs for some low  
377 clouds (putting the clouds too low) in Fig. 6f; the overestimation of the CBP is even  
378 more obvious from MMR in most regions in Fig. 6d.

379

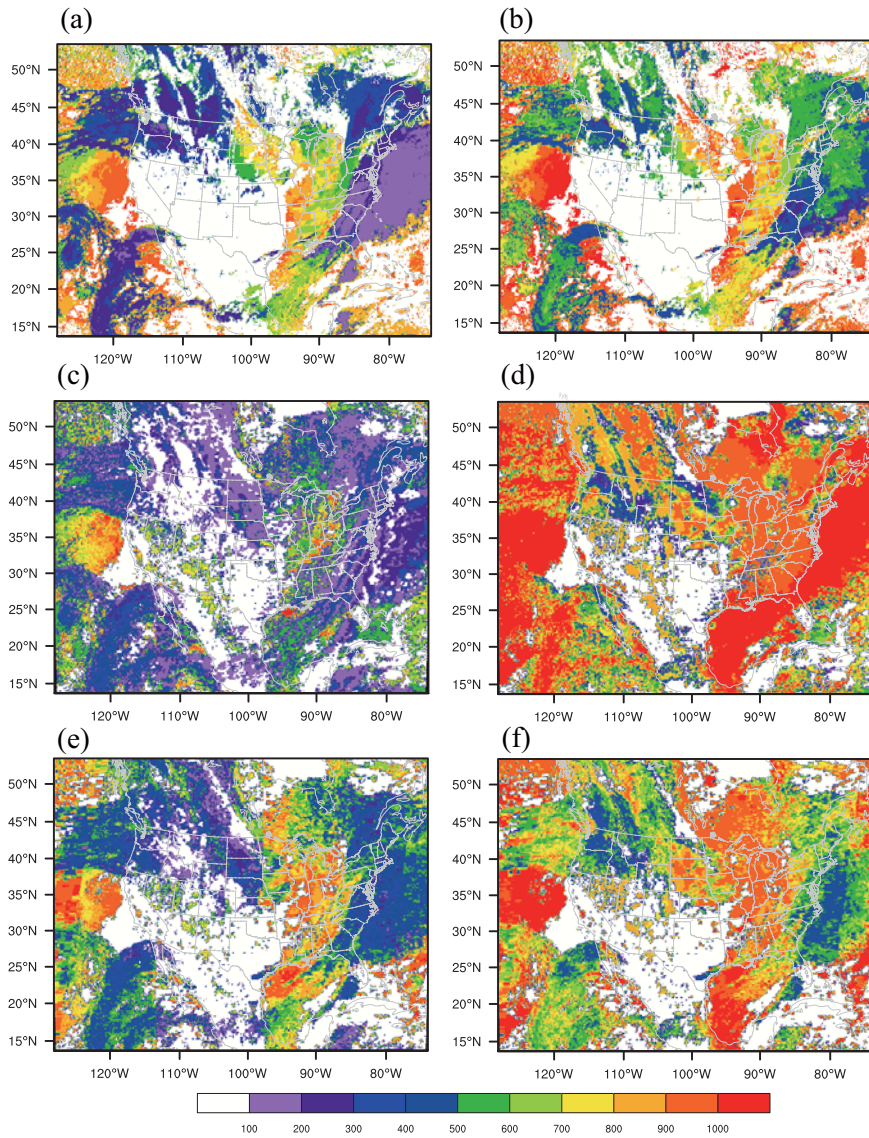

380

381 **Figure 6.** The cloud top pressure (left panels) from (a) the NASA GOES retrieval, (c) the MMR

382 method, (e) the APF method, and the cloud bottom pressure (right panels) from (b) the NASA

383 GOES retrieval, (d) the MMR method, (f) the APF method valid at 0700 UTC 15 December 2013.

384 The CTPs from NASA GOES cloud products for more hours (0300UTC,

385 0500UTC, 0700UTC) together with the independent CTP retrievals from MODIS

386 level-2 products ([http://modis-atmos.gsfc.nasa.gov/MOD06\\_L2/](http://modis-atmos.gsfc.nasa.gov/MOD06_L2/)) are plotted in Fig. 7.  
387 Different sub-periods of the MODIS cloud retrieval products (e.g., Fig. 7b valid at  
388 0320 UTC, Fig. 7c at 0325, and Fig. 7d at 0330 UTC) are chosen to approach the  
389 valid times in Fig. 7a, Fig. 7e, and Fig. 7h respectively. The CTPs from both cloud  
390 products agree well for both high and low clouds, confirming that NASA GOES cloud  
391 products are overall reliable for verifying the cloud retrievals and MODIS level-2  
392 products can also be applied for validations.

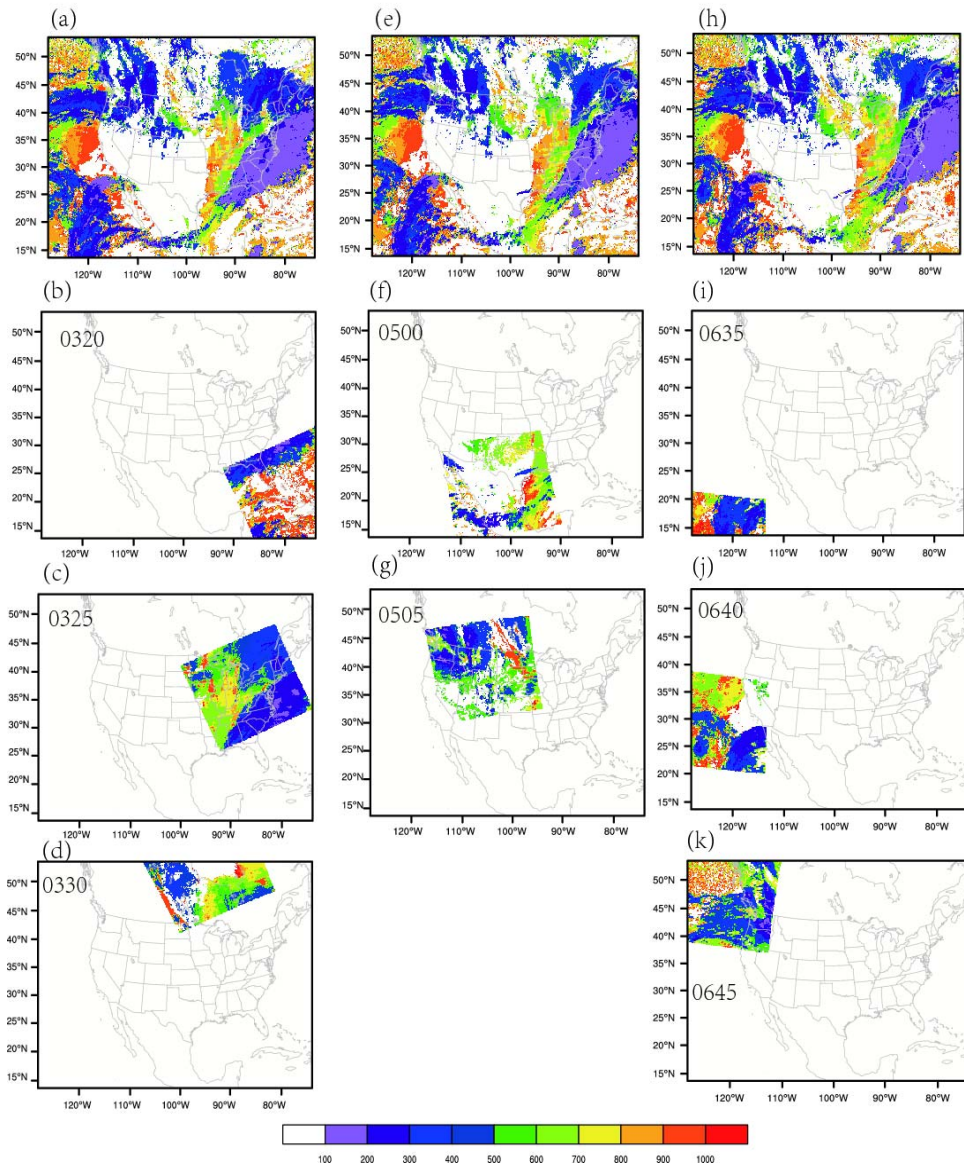

393

394 **Figure 7.** The cloud top pressure for (a) 0300UTC from the GOES NASA retrieval, (b) 0320UTC,

395 (c) 0325UTC, (d) 0330UTC from MODIS level-2 products; (e) 0500UTC from the GOES NASA

396 retrieval, (f) 0500UTC, (g) 0505UTC; (h) 0700UTC from the GOES NASA retrieval, (i)

397 0635UTC, (j) 0640UTC, and (k) 0645UTC from MODIS level-2 products.

398 Fig. 8 presents the correlation coefficients and biases of the CTP and CBP verified  
399 against the NASA GOES and MODIS retrievals. The solid lines denote the results  
400 regarding the CTP and CBP versus the NASA GOES products from 0000 UTC to  
401 0700 UTC, while the dots describe the CTP results versus the cloud top retrievals in  
402 NASA MODIS level-2 products at 0320UTC, 0325UTC, 0330UTC, 0500UTC,  
403 0505UTC, 0635UTC, 0640UTC, and 0645UTC. Here the negative bias means that the  
404 retrieved clouds are higher than the reference. Vice versa, the positive bias indicates  
405 the clouds are put too low. We conducted another experiment “APFing” that applies  
406 solely GOES Imager data to check the added value from the high spectral resolution  
407 radiances (such as, CrIS, AIRS, and IASI). In Fig. 8a, the correlations between the  
408 retrievals from MMR and the NASA GOES retrievals are comparable with from APF  
409 for most hours; APF gains overall higher correlations with the CTPs in the MODIS  
410 retrievals. From the bias in Fig. 8b, it seems that the CTPs from MMR are  
411 underestimated (putting the clouds too high) consistently against both retrievals with  
412 GOES and MODIS radiances. Fig. 8c shows that the correlations are weaker for  
413 MMR compared to others all the time. In Fig. 8d, the positive CBP biases from MMR  
414 are remarkable, while the CBP biases from APF are largely reduced. Generally,  
415 APFing degrades the CTP and CBP results consistently, suggesting that radiances  
416 with high spectral resolutions are able to improve the vertical descriptions of cloud  
417 profiles. It is found that the clouds retrieved with APFg2 are shrunken in terms of  
418 cloud depth with notably lower cloud top and higher cloud base compared to APF,  
419 when excluding the perturbed particles in the first group.

anna 2016-08-06 08:40

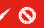

删除的内容: from



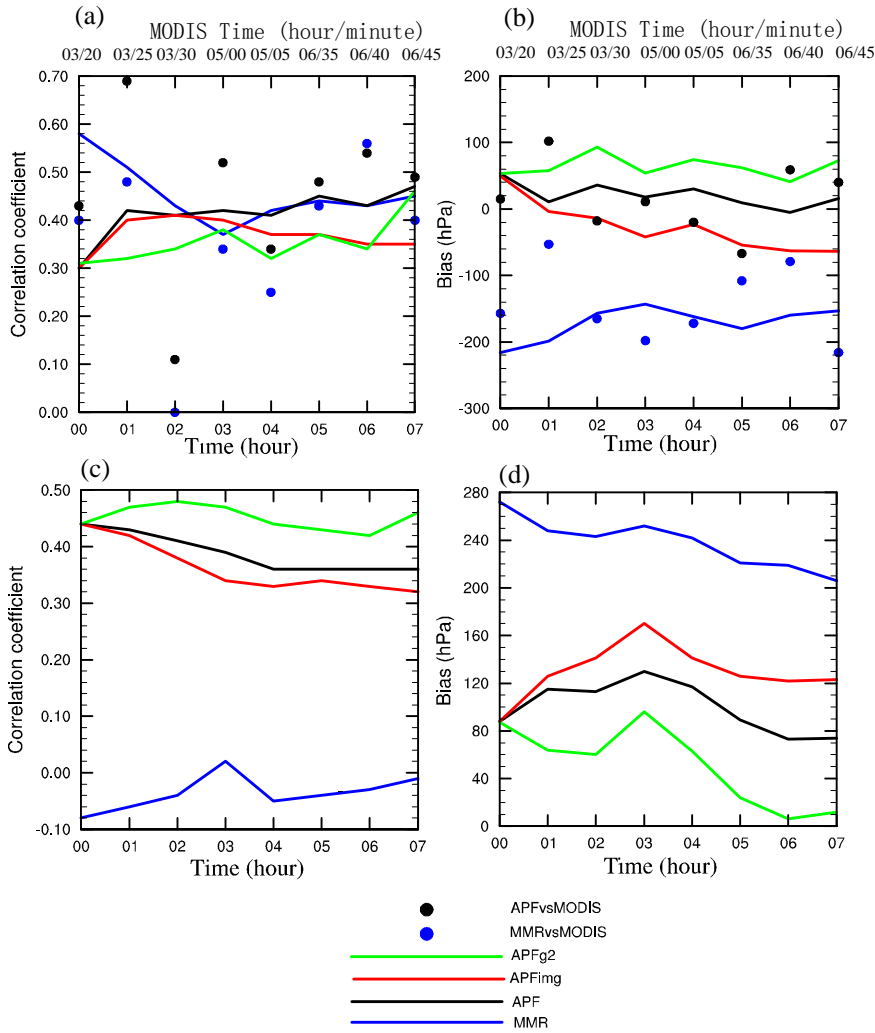

421

422 **Figure 8.** (a) Correlation coefficient, (b) bias for the cloud top pressure, (c) correlation coefficient,

423 and (d) bias for the cloud bottom pressure versus the NASA GOES retrievals from 0600 UTC 15

424 December 2013 to 0700 UTC 15 December 2013. Black and blue dots denote results versus the

425 MODIS level-2 cloud top pressure retrieval valid at 0320UTC, 0325UTC, 0330UTC, 0500UTC,

426 0505UTC, 0635UTC, 0640UTC, and 0645UTC. The valid times for the MODIS level-2 data are

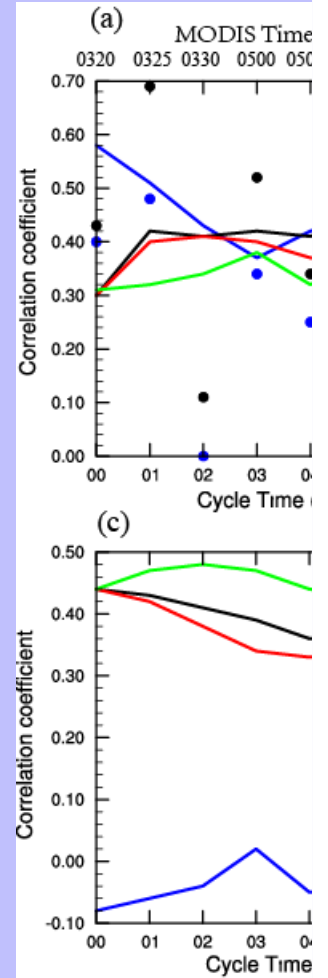

删除的内容:

427 shown on the top of the x-axis.

#### 428 4.5 Computational issues

429 Fig. 9a represents the elapsed times for the MMR and APF experiments and the  
430 counts of radiance observations in use are shown in Fig.9b from 0000 UTC to 0700  
431 UTC 12 December 2013. The profile of computing time in MMR is quite different  
432 from that in PF. The cost of MMR is dominated by the heavy minimization procedure,  
433 while APF is more associated with the processes of initializing particles and  
434 calculating weights for all the particles. The computing times were measured from  
435 cloud retrieving runs with 64 MPI-tasks on a single computing node in an IBM  
436 iDataPlex Cluster. The measured wall clock computing times show that generally  
437 MMR is computationally more expensive for most of the time than APF. It seems the  
438 wall clock times for MMR are generally proportional to the data amount used. While  
439 for the APF experiment, the wall clock time is mostly determined by the particles size  
440 and partly affected by the channel number, such as for 2013121202 and 2013121206,  
441 when the total counts of the hyperspectral sensors (IASI, CrIs, and AIRS) are large.  
442 The PF experiments using particles of one-layer cloud with 100% cloud fractions  
443 usually take less than 5 minutes for the same periods (not shown).

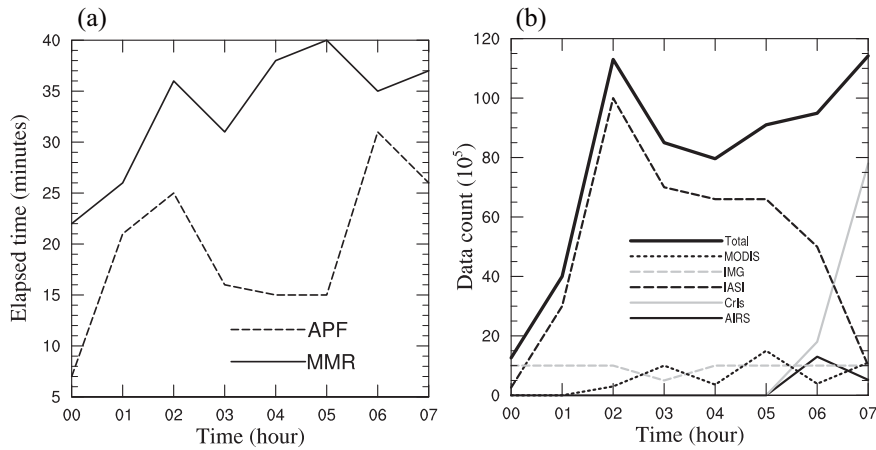

444  
 445 **Figure 9.** (a) The elapsed time and (b) the data count from 0000 UTC to 0700 UTC 15 December  
 446 2013.

447 4.6 Resolving the filtering problem on model grids

448 As explained in subsection 3.3, the filtering problem is resolved in the radiance  
 449 observational space at each FOV of each sensor independently and sequentially. For  
 450 each FOV, the retrieved cloud fractions are extrapolated to its neighboring model grid  
 451 points afterwards. We order the sensors in the cloud retrieving procedure as  
 452 GOES-Imager, MODIS, CrIS, AIRS, and IASI, aiming to optimize the vertical clouds  
 453 using sensors featured with sufficient spectral resolutions. As a consequence, the  
 454 retrievals from the last sensor determine the final output to the most extent, causing  
 455 the cloud retrievals highly subjective to the ordering of the sensors. On the other hand,  
 456 it means the information from other prior sensors will be more or less discarded. In  
 457 this section, a different way of resolving the filtering problem is preliminarily tested,  
 458 in which the weights for each particle are aggregated over all available sensors by

459 calling the forward radiative transfer model on neighbouring model grids.

460 Fig. 10 shows the clouds retrievals from the grid-based method. It is noted that  
461 the grid-based scheme yields slightly worse results of CTP and neutral results of CBP  
462 compared with those from the observation-based (FOV-based) scheme, indicating that  
463 the hyperspectral sensors probably favor the retrieved CTP and CBP in the  
464 FOV-based scheme, which are available for most of the time. It is worth pointing out  
465 that the ordering of different sensors has nearly no effect on the final cloud retrievals,  
466 when the weights of the particles are calculated in model space (not shown). The final  
467 cloud retrieval is no longer overwritten by the retrieval from the last sensor but is a  
468 total solution with all the sensors fairly considered, instead. The computational cost of  
469 retrieving clouds in model space is comparable or slightly heavier than that in  
470 observation space. The computational cost of the grid-based scheme scales with the  
471 number of the computing nodes more directly, compared to that of the FOV-based  
472 scheme.

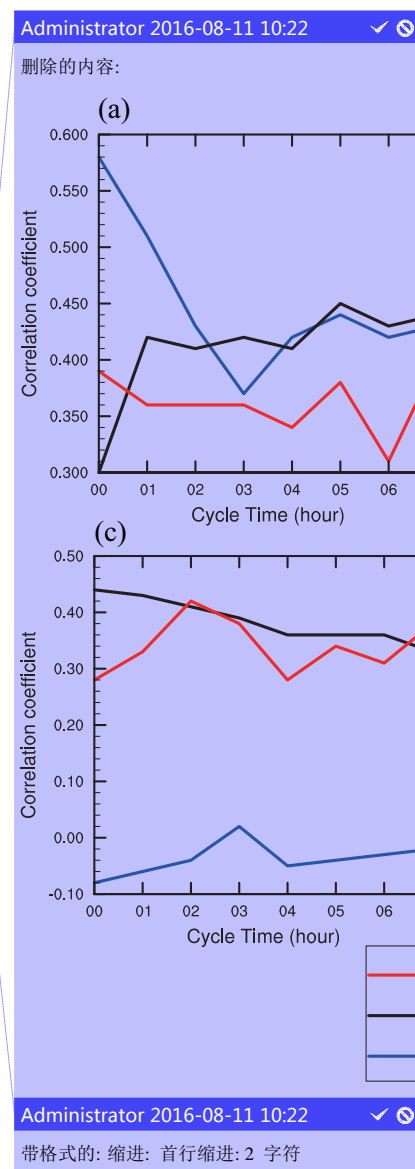

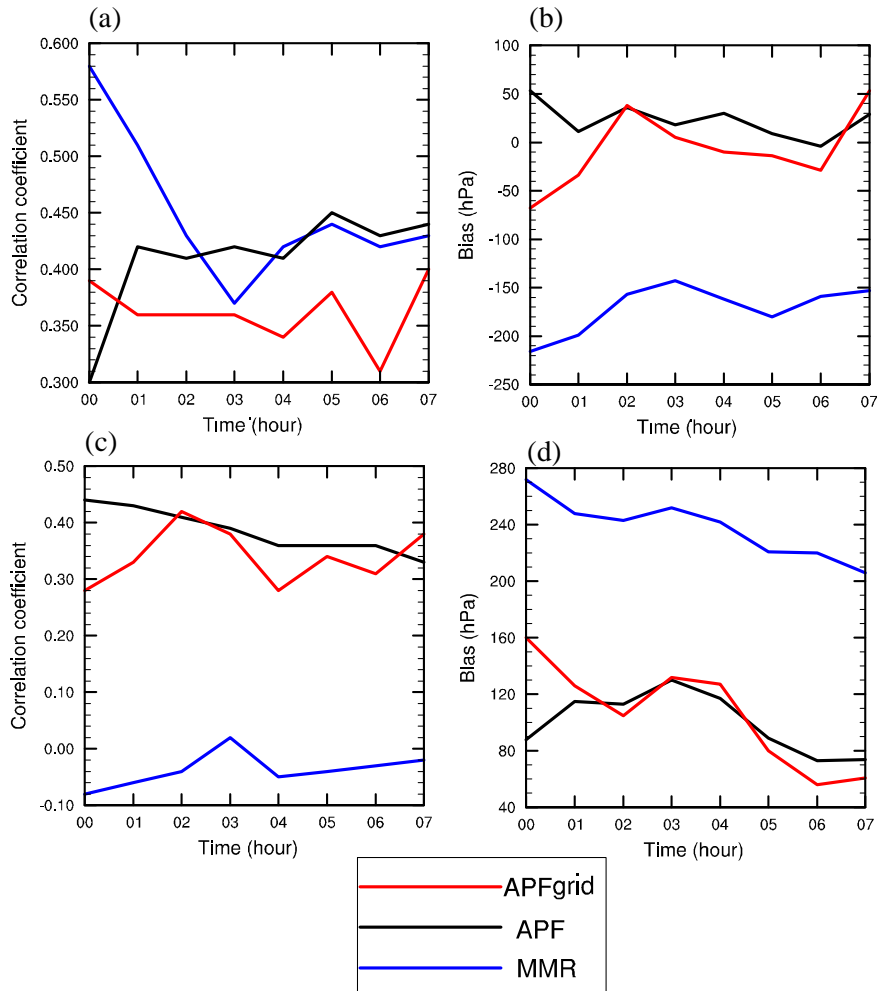

473

474 **Figure 10.** (a) Correlation coefficient, (b) bias for the cloud top pressure, (c) correlation  
 475 coefficient, and (d) bias for the cloud bottom pressure versus the NASA GOES retrievals from  
 476 0000 UTC to 0700 UTC 15 December 2013.

477 **5. Discussion and conclusion**

478        This study presents a new cloud retrieval method based on the particle filter (PF)  
479 in the framework of GSI, as a competitive alternative to the MMR method. The  
480 behaviors of different particle initializations are demonstrated on one single field of  
481 view and the CONUS domain respectively. Comparisons between the PF and the  
482 MMR method are conducted in terms of the features of cloud mask, cloud top, cloud  
483 base, and the vertical distributions of clouds. It was found that the PF method  
484 retrieves clear cloud signals while MMR is more ambiguous in detecting clouds. By  
485 adding more small-fraction particles, high clouds can be better interpreted. From the  
486 statistical results, it was found that MMR underestimates the cloud top pressures (put  
487 the clouds top too high) and overestimates the cloud bottom pressures (put the clouds  
488 top too low) as well. APF improves both the retrievals of cloud tops and cloud bases  
489 remarkably, especially for the cloud bases. As expected, radiances with high spectral  
490 resolutions contribute to quantitative cloud top and cloud base retrievals. In addition,  
491 a different way of resolving the filtering problem over each model grid is tested to  
492 aggregate the weights with all available sensors considered, which is proven to be less  
493 constrained by the ordering of sensors. Last but not least, the PF method is overall  
494 more computationally efficient; the cost of the model grid-based PF method scales  
495 more directly with the number of the computing nodes.

496        In future work, validation studies using multispectral imagers on geostationary  
497 satellites, spaceborne lidars (or radar), and surface site data will continue, and the  
498 results will be used to update the retrieval algorithm. Maximizing the consistency in  
499 the products across platforms and optimizing the synergistic use of multiple-source

500 radiances in the new algorithm are important aspects. To estimate the flow dependent  
501 uncertainties in the cloud analysis and in the forecasts, the ensemble nowcasting with  
502 three dimensional cloud fractions via the rapid-update cycling mode is also planned.  
503 Increasing the highest extent cloudy cases will be included in future studies. Finally,  
504 the use of cloud liquid water and ice mixing ratios retrieved from the cloud fractions  
505 using multi-sensor radiances to pre-process the first guess in numerical weather  
506 forecast is another promising application.

#### 507 **Code and/or data availability**

508 The MMR cloud retrieval codes can be obtained freely from  
509 (<http://www2.mmm.ucar.edu/wrf/users/wrfda/>). The other codes can be obtained by  
510 emails from the authors.

#### 511 **Acknowledgments**

512 This work was jointly sponsored by the Natural Science Foundation of Jiangsu  
513 Province under Grant No BK20160954, the 973 Program (Grant No. 2013CB430102)  
514 , the Beijige Funding from Jiangsu Research Institute of Meteorological Science  
515 (BJG201510), the National Natural Science Foundation of China (41375025), and the  
516 Priority Academic Program Development of Jiangsu Higher Education Institutions  
517 (PAPD). The authors would like to thank Chris Davis for fruitful discussions, and to  
518 Bobbie Weaver for editing the manuscript. We greatly thank the anonymous reviewers  
519 for their valuable comments on the earlier versions of the manuscript.

520 **REFERENCES**

- 521 Ackerman, S. A., K. I. Strabala, W. P. Menzel, R. A. Frey, C. C. Moeller, and L. E.  
522 Gumley: Discriminating clear sky from clouds with MODIS, *Geophys. Res.*  
523 *Atmos.*, 103, 32141-32157, 1998.
- 524 Auligné, T., Lorenc, A., Michel, Y., Montmerle, T., Jones, A., Hu, M., and Dudhia, J.:  
525 Toward a New Cloud Analysis and Prediction System, *B Am Meteorol Soc*, 92,  
526 207-210, 2011.
- 527 Auligné, T.: Multivariate minimum residual method for cloud retrieval. Part I:  
528 Theoretical aspects and simulated observation experiments, *Monthly Weather*  
529 *Review*, 142, 4383-4398, 2014a.
- 530 Auligné, T.: Multivariate minimum residual method for cloud retrieval. Part II: Real  
531 observations experiments, *Monthly Weather Review*, 142, 4399-4415, 2014b.
- 532 Aumann, H. H., Chahine, M. T., Gautier, C., Goldberg, M. D., Kalnay, E., McMillin,  
533 L. M., Revercomb, H., Rosenkranz, P. W., Smith, W. L., and Staelin, D. H.:  
534 AIRS/AMSU/HSB on the Aqua mission: Design, science objectives, data products,  
535 and processing systems, *Geoscience and Remote Sensing, IEEE Transactions on*,  
536 41, 253-264, 2003.
- 537 Bayler, G. M., Aune, R., and Raymond, W.: NWP cloud initialization using GOES  
538 sounder data and improved modeling of nonprecipitating clouds, *Monthly weather*  
539 *review*, 128, 3911-3920, 2000.
- 540 Berrocal, V. J., Raftery, A. E., and Gneiting, T.: Combining spatial statistical and  
541 ensemble information in probabilistic weather forecasts, *Monthly Weather Review*,  
542 135, 1386-1402, 2007.
- 543 Blumstein, D., Chalon, G., Carlier, T., Buil, C., Hebert, P., Maciaszek, T., Ponce, G.,  
544 Phulpin, T., Tournier, B., and Simeoni, D.: IASI instrument: Technical overview  
545 and measured performances, *Optical Science and Technology, the SPIE 49th*  
546 *Annual Meeting*, 2004, 196-207,
- 547 Brückner, M., Pospichal, B., Macke, A., and Wendisch, M.: A new multispectral cloud  
548 retrieval method for ship - based solar transmissivity measurements, *Journal of*  
549 *Geophysical Research: Atmospheres*, 119, 2014.
- 550 Descombes, G., Auligne, T., and Lin, H.-C., Xu, D., Schwartz, C. S., Vandenberghe, F.:  
551 Multi-sensor Advection Diffusion nowCast (MADCast) for cloud analysis and  
552 short-term prediction., *NCAR Technical Note NCAR/TN-509+STR*, , 21 pp.,  
553 2014.
- 554 Eyre, J. R., and Menzel, W. P.: Retrieval of cloud parameters from satellite sounder  
555 data: A simulation study, *Journal of Applied Meteorology*, 28, 267-275, 1989.
- 556 Han, Y., Delst, P. V., Liu, Q., Weng, F., Yan, B., Treadon, R., and Derber, J.: JCSDA  
557 Community Radiative Transfer Model (CRTM)—Version 1, *NOAA Tech. Rep.*  
558 *NESDIS*, 122, 33, 2006.
- 559 Hu, M., Xue, M., and Brewster, K.: 3DVAR and Cloud Analysis with WSR-88D  
560 Level-II Data for the Prediction of the Fort Worth, Texas, Tornadoic Thunderstorms.  
561 Part I: Cloud Analysis and Its Impact, *Monthly Weather Review*, 134, 675-698,  
562 10.1175/mwr3092.1, 2006.
- 563 Huang, H.-L., Smith, W. L., Li, J., Antonelli, P., Wu, X., Knuteson, R. O., Huang, B.,



564 and Osborne, B. J.: Minimum local emissivity variance retrieval of cloud altitude  
565 and effective spectral emissivity-simulation and initial verification, *Journal of*  
566 *applied meteorology*, 43, 795-809, 2004.

567 Karlsson, K.-G., Johansson, E., and Devasthale, A.: Advancing the uncertainty  
568 characterisation of cloud masking in passive satellite imagery: Probabilistic  
569 formulations for NOAA AVHRR data, *Remote Sensing of Environment*, 158,  
570 126-139, 2015.

571 Kleist, D. T., Parrish, D. F., Derber, J. C., Treadon, R., Wu, W. S., and Lord, S.:  
572 Introduction of the GSI into the NCEP Global Data Assimilation System, *Weather*  
573 *and Forecasting*, 24, 1691-1705, 10.1175/2009waf2222201.1, 2009.

574 Liu, Q., and Weng, F.: Advanced doubling-adding method for radiative transfer in  
575 planetary atmospheres, *Journal of the atmospheric sciences*, 63, 3459-3465, 2006.

576 Mace, G. G., 2004: Level 2 GEOPROF product process description and interface  
577 control document (v.3): Level 2 GEOPROF product process description and  
578 interface control document (v.3), Tech. rep., CIRA, Colorado State University,  
579 2004.

580 Mechri, R., Ottlé, C., Pannekoucke, O., and Kallel, A.: Genetic particle filter  
581 application to land surface temperature downscaling, *Journal of Geophysical*  
582 *Research: Atmospheres*, 119, 2131-2146, 2014.

583 Menzel, W., Smith, W., and Stewart, T.: Improved cloud motion wind vector and  
584 altitude assignment using VAS, *Journal of Climate and Applied meteorology*, 22,  
585 377-384, 1983.

586 Menzel, W. P., and Purdom, J. F.: Introducing GOES-I: The first of a new generation  
587 of geostationary operational environmental satellites, *B Am Meteorol Soc*, 75,  
588 757-781, 1994.

589 Platnick, S., King, M. D., Ackerman, S. A., Menzel, W. P., Baum, B. A., Riédi, J. C.,  
590 and Frey, R. A.: The MODIS cloud products: Algorithms and examples from Terra,  
591 *Geoscience and Remote Sensing, IEEE Transactions on*, 41, 459-473, 2003.

592 Rossow, W. B., and Schiffer, R. A.: ISCCP cloud data products, *B Am Meteorol Soc*,  
593 72, 2-20, 1991.

594 Rossow, W. B., Walker, A. W., and Garder, L. C.: Comparison of ISCCP and other  
595 cloud amounts, *Journal of Climate*, 6, 2394-2418, 1993.

596 Shen, Z. Q., and Tang, Y. M.: A modified ensemble Kalman particle filter for  
597 non-Gaussian systems with nonlinear measurement functions, *J Adv Model Earth*  
598 *Sy*, 7, 50-66, 2015.

599 Skamarock, W., C, Klemp, J. B., Dudhia, J., Gill, D. O., Barker, D. M., Duda, G.,  
600 Huang, X.-Y., Wang, W., and Powers, J. G.: A description of the Advanced  
601 Research WRF version 3., NCAR, 113, 2008.

602 Smith, A., Atkinson, N., Bell, W., and Doherty, A.: An initial assessment of  
603 observations from the Suomi - NPP satellite: data from the Cross - track Infrared  
604 Sounder (CrIS), *Atmospheric Science Letters*, 16, 260-266, 2015.

605 Snyder, C., and Zhang, F. Q.: Assimilation of simulated Doppler radar observations  
606 with an ensemble Kalman filter, *Monthly Weather Review*, 131, 1663-1677, Doi  
607 10.1175//2555.1, 2003.

608 Stephens, G. L., Vane, D. G., Boain, R. J., Mace, G. G., Sassen, K., Wang, Z.,  
609 Illingworth, A. J., O'Connor, E. J., Rossow, W. B., and Durden, S. L.: The  
610 CloudSat mission and the A-Train: A new dimension of space-based observations  
611 of clouds and precipitation, *B Am Meteorol Soc*, 83, 1771-1790, 2002.  
612 van Leeuwen, P. J.: Nonlinear data assimilation in geosciences: an extremely efficient  
613 particle filter, *Quarterly Journal of the Royal Meteorological Society*, 136,  
614 1991-1999, 2010.  
615 Wu, W.-S., Purser, R. J., and Parrish, D. F.: Three-dimensional variational analysis  
616 with spatially inhomogeneous covariances, *Monthly Weather Review*, 130,  
617 2905-2916, 2002.  
618 Wu, X., and Smith, W. L.: Assimilation of ERBE data with a nonlinear programming  
619 technique to improve cloud-cover diagnostics, 120, 2009-2004, 1992.  
620 Xu, D., Auligné, T., and Huang, X.-Y.: A Retrieval Method for 3-D Cloud Parameters  
621 Using Radiance Observations from Multiple Satellites, *Advances in atmospheric*  
622 *physics*, 32, 349-362, 2015.  
623 Xu, D. M., Liu, Z. Q., Huang, X. Y., Min, J. Z., and Wang, H. L.: Impact of  
624 assimilating IASI radiance observations on forecasts of two tropical cyclones,  
625 *Meteorology and Atmospheric Physics*, 122, 1-18, 10.1007/s00703-013-0276-2,  
626 2013.  
627 Zhao, C., Xie, S., Klein, S. A., Protat, A., Shupe, M. D., McFarlane, S. A., Comstock,  
628 J. M., Delanoë, J., Deng, M., and Dunn, M.: Toward understanding of differences  
629 in current cloud retrievals of ARM ground - based measurements, *Journal of*  
630 *Geophysical Research: Atmospheres*, 117, 2012.  
631

632
