# Supplementary material for: A method for retrieving clouds with satellite infrared radiances using the particle filter
Source: Copernicus journal article supplement (doi:10.5194/gmd-2016-150), 2016-07-04
Supplement: Supplementary file [file gmd-2016-150-RC3-supplement.pdf]

Comments to author:

The authors have done some work to appropriately address my remarks and provide answers. The relevant discussion was also included at several places throughout the manuscript. I therefore recommend the manuscript be accepted for publication once the authors make the following typos that should still be considered.

L15: May delete 'efficient'.

L39: Consider using 'remote sensing of earth' instead of 'earth remote sensing'.

L51: May use [ ] instead of the outer ().

L66: May use 'various' or other words instead of 'all kinds of' ?

L118: Similar to the study (or implementation ) in Mechri et al.....

L125: May delete 'Explicitly'.

L136: The equation never happens in mathematic unless  $\alpha$  is 1. May use another letter for the left  $C_b$ .

L150: Eq.2  $\rightarrow$  Eq. 3

L154: Move the definition of  $\sigma$  at L158 to this line.

L158: Is n at L137 the same as p at L158 ? If so, why not use the same letter, n or p ?

L255: The sentence is too long. Rewrite it.

L297: Fig. 2 looks fine. However, cloud fraction and Normalized Jo are not the same thing. It may be better to consider Normalized Jo as Fig. 3.
